# Supplementary material for: Overexpression of FNDC1 in Gastric Cancer and its Prognostic Significance
Source: PubMed Central journal article supplement — J Cancer. 2018 Nov 13;9(24):4586–95. doi: 10.7150/jca.27672 (PMC6299387; doi:10.7150/jca.27672), 2018-11-13
Supplement: jcav09p4586s1.pdf [file jcav09p4586s1.pdf]

Table S1. Detailed IRS scores of gastric cancer tissue specimens.

| Specimen | Field 1 |    |     | Field 2 |    |     | Field 3 |    |     | Mean IRS |
|----------|---------|----|-----|---------|----|-----|---------|----|-----|----------|
|          | SI      | PP | IRS | SI      | PP | IRS | SI      | PP | IRS |          |
| 1        | 3       | 2  | 6   | 1       | 3  | 3   | 3       | 3  | 9   | 6.00     |
| 2        | 2       | 3  | 6   | 2       | 2  | 4   | 3       | 2  | 6   | 5.33     |
| 3        | 3       | 3  | 9   | 1       | 3  | 3   | 3       | 4  | 12  | 8.00     |
| 4        | 3       | 3  | 9   | 3       | 2  | 6   | 3       | 2  | 6   | 7.00     |
| 5        | 3       | 2  | 6   | 3       | 4  | 12  | 2       | 3  | 6   | 8.00     |
| 6        | 2       | 4  | 8   | 3       | 2  | 6   | 2       | 3  | 6   | 6.67     |
| 7        | 3       | 2  | 6   | 3       | 3  | 9   | 3       | 3  | 9   | 8.00     |
| 8        | 3       | 2  | 6   | 3       | 3  | 9   | 3       | 1  | 3   | 6.00     |
| 9        | 3       | 3  | 9   | 3       | 4  | 12  | 3       | 2  | 6   | 9.00     |
| 10       | 2       | 4  | 8   | 3       | 2  | 6   | 2       | 3  | 6   | 6.67     |
| 11       | 0       | 0  | 0   | 0       | 0  | 0   | 0       | 0  | 0   | 0.00     |
| 12       | 1       | 1  | 1   | 1       | 1  | 1   | 2       | 1  | 2   | 1.33     |
| 13       | 2       | 2  | 4   | 1       | 4  | 4   | 1       | 2  | 2   | 3.33     |
| 14       | 1       | 2  | 2   | 1       | 2  | 2   | 1       | 1  | 1   | 1.67     |
| 15       | 3       | 3  | 9   | 3       | 3  | 9   | 3       | 4  | 12  | 10.00    |
| 16       | 1       | 3  | 3   | 1       | 4  | 4   | 2       | 2  | 4   | 3.67     |
| 17       | 2       | 3  | 6   | 2       | 4  | 8   | 2       | 4  | 8   | 7.33     |
| 18       | 2       | 4  | 8   | 1       | 4  | 4   | 3       | 2  | 6   | 6.00     |
| 19       | 2       | 3  | 6   | 2       | 3  | 6   | 1       | 2  | 2   | 4.67     |
| 20       | 3       | 3  | 9   | 3       | 4  | 12  | 3       | 4  | 12  | 11.00    |
| 21       | 2       | 3  | 6   | 2       | 4  | 8   | 2       | 4  | 8   | 7.33     |
| 22       | 2       | 4  | 8   | 2       | 3  | 6   | 3       | 3  | 9   | 7.67     |
| 23       | 2       | 4  | 8   | 3       | 2  | 6   | 2       | 4  | 8   | 7.33     |
| 24       | 3       | 2  | 6   | 2       | 3  | 6   | 2       | 3  | 6   | 6.00     |
| 25       | 2       | 3  | 6   | 3       | 4  | 12  | 2       | 2  | 4   | 7.33     |
| 26       | 2       | 4  | 8   | 0       | 0  | 0   | 2       | 3  | 6   | 4.67     |
| 27       | 2       | 4  | 8   | 2       | 3  | 6   | 2       | 3  | 6   | 6.67     |
| 28       | 2       | 4  | 8   | 1       | 2  | 2   | 2       | 3  | 6   | 5.33     |
| 29       | 3       | 2  | 6   | 1       | 3  | 3   | 3       | 3  | 9   | 6.00     |

---

|    |   |   |    |   |   |   |   |   |    |       |
|----|---|---|----|---|---|---|---|---|----|-------|
| 30 | 2 | 3 | 6  | 2 | 1 | 2 | 2 | 4 | 8  | 5.33  |
| 31 | 2 | 4 | 8  | 2 | 4 | 8 | 2 | 3 | 6  | 7.33  |
| 32 | 3 | 2 | 6  | 3 | 2 | 6 | 3 | 2 | 6  | 6.00  |
| 33 | 1 | 4 | 4  | 2 | 2 | 4 | 2 | 1 | 2  | 3.33  |
| 34 | 2 | 2 | 4  | 1 | 4 | 4 | 1 | 2 | 2  | 3.33  |
| 35 | 2 | 4 | 8  | 1 | 2 | 2 | 2 | 3 | 6  | 5.33  |
| 36 | 2 | 3 | 6  | 2 | 4 | 8 | 2 | 4 | 8  | 7.33  |
| 37 | 1 | 1 | 1  | 1 | 2 | 2 | 3 | 1 | 3  | 2.00  |
| 38 | 2 | 4 | 8  | 3 | 2 | 6 | 2 | 4 | 8  | 7.33  |
| 39 | 3 | 2 | 6  | 3 | 3 | 9 | 3 | 3 | 9  | 8.00  |
| 40 | 1 | 3 | 3  | 1 | 3 | 3 | 1 | 3 | 3  | 3.00  |
| 41 | 3 | 1 | 3  | 2 | 3 | 6 | 1 | 3 | 3  | 4.00  |
| 42 | 3 | 2 | 6  | 3 | 1 | 3 | 2 | 3 | 6  | 5.00  |
| 43 | 2 | 4 | 8  | 2 | 4 | 8 | 2 | 3 | 6  | 7.33  |
| 44 | 2 | 3 | 6  | 2 | 4 | 8 | 3 | 2 | 6  | 6.67  |
| 45 | 2 | 4 | 8  | 3 | 2 | 6 | 2 | 4 | 8  | 7.33  |
| 46 | 3 | 2 | 6  | 3 | 3 | 9 | 3 | 3 | 9  | 8.00  |
| 47 | 2 | 4 | 8  | 2 | 2 | 4 | 2 | 4 | 8  | 6.67  |
| 48 | 1 | 3 | 3  | 2 | 1 | 2 | 1 | 3 | 3  | 2.67  |
| 49 | 1 | 2 | 2  | 2 | 2 | 4 | 1 | 2 | 2  | 2.67  |
| 50 | 2 | 3 | 6  | 2 | 2 | 4 | 2 | 4 | 8  | 6.00  |
| 51 | 2 | 3 | 6  | 3 | 2 | 6 | 1 | 1 | 1  | 4.33  |
| 52 | 3 | 4 | 12 | 3 | 3 | 9 | 3 | 3 | 9  | 10.00 |
| 53 | 2 | 3 | 6  | 2 | 4 | 8 | 2 | 2 | 4  | 6.00  |
| 54 | 2 | 2 | 4  | 2 | 3 | 6 | 2 | 1 | 2  | 4.00  |
| 55 | 2 | 2 | 4  | 2 | 2 | 4 | 2 | 2 | 4  | 4.00  |
| 56 | 2 | 1 | 2  | 1 | 1 | 1 | 2 | 3 | 6  | 3.00  |
| 57 | 2 | 4 | 8  | 2 | 4 | 8 | 2 | 4 | 8  | 8.00  |
| 58 | 2 | 3 | 6  | 3 | 2 | 6 | 3 | 2 | 6  | 6.00  |
| 59 | 3 | 2 | 6  | 3 | 1 | 3 | 3 | 3 | 9  | 6.00  |
| 60 | 3 | 3 | 9  | 3 | 3 | 9 | 1 | 3 | 3  | 7.00  |
| 61 | 3 | 2 | 6  | 1 | 3 | 3 | 3 | 4 | 12 | 7.00  |

---

|    |   |   |    |   |   |    |   |   |    |       |
|----|---|---|----|---|---|----|---|---|----|-------|
| 62 | 3 | 2 | 6  | 3 | 3 | 9  | 3 | 3 | 9  | 8.00  |
| 63 | 2 | 3 | 6  | 1 | 4 | 4  | 2 | 2 | 4  | 4.67  |
| 64 | 2 | 3 | 6  | 2 | 2 | 4  | 2 | 4 | 8  | 6.00  |
| 65 | 1 | 4 | 4  | 1 | 3 | 3  | 1 | 2 | 2  | 3.00  |
| 66 | 2 | 2 | 4  | 2 | 3 | 6  | 0 | 0 | 0  | 3.33  |
| 67 | 3 | 2 | 6  | 3 | 3 | 9  | 3 | 3 | 9  | 8.00  |
| 68 | 3 | 1 | 3  | 3 | 1 | 3  | 1 | 3 | 3  | 3.00  |
| 69 | 1 | 3 | 3  | 2 | 1 | 2  | 1 | 2 | 2  | 2.33  |
| 70 | 3 | 2 | 6  | 3 | 3 | 9  | 3 | 3 | 9  | 8.00  |
| 71 | 3 | 4 | 12 | 3 | 4 | 12 | 3 | 4 | 12 | 12.00 |
| 72 | 2 | 4 | 8  | 3 | 2 | 6  | 2 | 2 | 4  | 6.00  |
| 73 | 2 | 3 | 6  | 2 | 3 | 6  | 2 | 3 | 6  | 6.00  |
| 74 | 3 | 4 | 12 | 3 | 3 | 9  | 3 | 1 | 3  | 8.00  |
| 75 | 3 | 4 | 12 | 3 | 3 | 9  | 3 | 2 | 6  | 9.00  |
| 76 | 3 | 2 | 6  | 3 | 1 | 3  | 2 | 3 | 6  | 5.00  |
| 77 | 2 | 3 | 6  | 3 | 3 | 9  | 2 | 4 | 8  | 7.67  |
| 78 | 3 | 1 | 3  | 3 | 1 | 3  | 3 | 2 | 6  | 4.00  |
| 79 | 1 | 3 | 3  | 2 | 1 | 2  | 2 | 1 | 2  | 2.33  |
| 80 | 1 | 3 | 3  | 3 | 1 | 3  | 2 | 1 | 2  | 2.67  |
| 81 | 1 | 2 | 2  | 1 | 1 | 1  | 1 | 4 | 4  | 2.33  |
| 82 | 3 | 3 | 9  | 3 | 4 | 12 | 0 | 0 | 0  | 7.00  |
| 83 | 3 | 3 | 9  | 3 | 3 | 9  | 1 | 3 | 3  | 7.00  |
| 84 | 2 | 3 | 6  | 2 | 4 | 8  | 3 | 2 | 6  | 6.67  |
| 85 | 2 | 4 | 8  | 2 | 4 | 8  | 2 | 4 | 8  | 8.00  |
| 86 | 3 | 3 | 9  | 3 | 3 | 9  | 3 | 4 | 12 | 10.00 |
| 87 | 3 | 2 | 6  | 2 | 3 | 6  | 3 | 3 | 9  | 7.00  |
| 88 | 2 | 2 | 4  | 1 | 2 | 2  | 1 | 2 | 2  | 2.67  |
| 89 | 3 | 1 | 3  | 0 | 0 | 0  | 0 | 0 | 0  | 1.00  |
| 90 | 2 | 3 | 6  | 3 | 2 | 6  | 2 | 2 | 4  | 5.33  |

SI: staining intensity.

PP: percentage of positive cells.

IRS: immunoreactive score.

Table S2. Detailed IRS scores of gastric normal tissue specimens.

| Specimen | Field 1 |    |     | Field 2 |    |     | Field 3 |    |     | Mean IRS |
|----------|---------|----|-----|---------|----|-----|---------|----|-----|----------|
|          | SI      | PP | IRS | SI      | PP | IRS | SI      | PP | IRS |          |
| 1        | 3       | 2  | 6   | 3       | 3  | 9   | 3       | 2  | 6   | 7.00     |
| 2        | 3       | 2  | 6   | 2       | 3  | 6   | 3       | 4  | 12  | 8.00     |
| 3        | 1       | 2  | 2   | 1       | 3  | 3   | 1       | 1  | 1   | 2.00     |
| 4        | 2       | 2  | 4   | 1       | 3  | 3   | 3       | 1  | 3   | 3.33     |
| 5        | 2       | 2  | 4   | 2       | 1  | 2   | 2       | 1  | 2   | 2.67     |
| 6        | 2       | 4  | 8   | 2       | 2  | 4   | 2       | 4  | 8   | 6.67     |
| 7        | 3       | 3  | 9   | 2       | 3  | 6   | 2       | 3  | 6   | 7.00     |
| 8        | 3       | 2  | 6   | 2       | 3  | 6   | 3       | 2  | 6   | 6.00     |
| 9        | 3       | 2  | 6   | 3       | 3  | 9   | 3       | 3  | 9   | 8.00     |
| 10       | 2       | 2  | 4   | 2       | 1  | 2   | 2       | 1  | 2   | 2.67     |
| 11       | 0       | 0  | 0   | 0       | 0  | 0   | 0       | 0  | 0   | 0.00     |
| 12       | 2       | 1  | 2   | 2       | 1  | 2   | 2       | 1  | 2   | 2.00     |
| 13       | 2       | 2  | 4   | 1       | 2  | 2   | 0       | 0  | 0   | 2.00     |
| 14       | 3       | 1  | 3   | 1       | 1  | 1   | 1       | 1  | 1   | 1.67     |
| 15       | 1       | 2  | 2   | 2       | 1  | 2   | 1       | 3  | 3   | 2.33     |
| 16       | 3       | 1  | 3   | 1       | 1  | 1   | 1       | 3  | 3   | 2.33     |
| 17       | 1       | 2  | 2   | 2       | 2  | 4   | 2       | 2  | 4   | 3.33     |
| 18       | 3       | 2  | 6   | 3       | 3  | 9   | 3       | 3  | 9   | 8.00     |
| 19       | 1       | 3  | 3   | 3       | 2  | 6   | 3       | 2  | 6   | 5.00     |
| 20       | 3       | 2  | 6   | 2       | 3  | 6   | 1       | 3  | 3   | 5.00     |
| 21       | 2       | 1  | 2   | 1       | 1  | 1   | 2       | 1  | 2   | 1.67     |
| 22       | 1       | 2  | 2   | 1       | 2  | 2   | 1       | 2  | 2   | 2.00     |
| 23       | 2       | 4  | 8   | 2       | 2  | 4   | 2       | 4  | 8   | 6.67     |
| 24       | 1       | 2  | 2   | 2       | 1  | 2   | 2       | 1  | 2   | 2.00     |
| 25       | 1       | 2  | 2   | 1       | 2  | 2   | 2       | 2  | 4   | 2.67     |
| 26       | 1       | 2  | 2   | 2       | 2  | 4   | 1       | 3  | 3   | 3.00     |
| 27       | 2       | 2  | 4   | 2       | 2  | 4   | 2       | 1  | 2   | 3.33     |
| 28       | 2       | 2  | 4   | 2       | 1  | 2   | 2       | 1  | 2   | 2.67     |
| 29       | 2       | 3  | 6   | 2       | 1  | 2   | 2       | 4  | 8   | 5.33     |

---

|    |   |   |   |   |   |    |   |   |    |       |
|----|---|---|---|---|---|----|---|---|----|-------|
| 30 | 3 | 2 | 6 | 1 | 3 | 3  | 3 | 3 | 9  | 6.00  |
| 31 | 1 | 2 | 2 | 1 | 4 | 4  | 2 | 2 | 4  | 3.33  |
| 32 | 2 | 1 | 2 | 2 | 1 | 2  | 2 | 1 | 2  | 2.00  |
| 33 | 2 | 2 | 4 | 2 | 1 | 2  | 2 | 3 | 6  | 4.00  |
| 34 | 1 | 3 | 3 | 1 | 3 | 3  | 1 | 3 | 3  | 3.00  |
| 35 | 3 | 2 | 6 | 3 | 3 | 9  | 3 | 2 | 6  | 7.00  |
| 36 | 2 | 3 | 6 | 2 | 1 | 2  | 2 | 3 | 6  | 4.67  |
| 37 | 3 | 1 | 3 | 3 | 1 | 3  | 3 | 1 | 3  | 3.00  |
| 38 | 3 | 3 | 9 | 3 | 4 | 12 | 3 | 4 | 12 | 11.00 |
| 39 | 2 | 4 | 8 | 1 | 4 | 4  | 2 | 4 | 8  | 6.67  |
| 40 | 1 | 2 | 2 | 1 | 2 | 2  | 2 | 2 | 4  | 2.67  |
| 41 | 2 | 1 | 2 | 2 | 3 | 6  | 2 | 1 | 2  | 3.33  |
| 42 | 3 | 2 | 6 | 3 | 3 | 9  | 3 | 3 | 9  | 8.00  |
| 43 | 3 | 2 | 6 | 3 | 3 | 9  | 3 | 3 | 9  | 8.00  |
| 44 | 1 | 2 | 2 | 1 | 3 | 3  | 1 | 3 | 3  | 2.67  |
| 45 | 2 | 3 | 6 | 3 | 2 | 6  | 2 | 2 | 4  | 5.33  |
| 46 | 2 | 3 | 6 | 2 | 3 | 6  | 2 | 3 | 6  | 6.00  |
| 47 | 1 | 2 | 2 | 1 | 3 | 3  | 1 | 3 | 3  | 2.67  |
| 48 | 3 | 1 | 3 | 3 | 2 | 6  | 1 | 3 | 3  | 4.00  |
| 49 | 3 | 1 | 3 | 2 | 3 | 6  | 1 | 3 | 3  | 4.00  |
| 50 | 1 | 2 | 2 | 1 | 4 | 4  | 3 | 1 | 3  | 3.00  |
| 51 | 1 | 2 | 2 | 3 | 1 | 3  | 3 | 1 | 3  | 2.67  |
| 52 | 2 | 2 | 4 | 1 | 2 | 2  | 2 | 1 | 2  | 2.67  |
| 53 | 2 | 2 | 4 | 2 | 3 | 6  | 1 | 2 | 2  | 4.00  |
| 54 | 3 | 1 | 3 | 3 | 2 | 6  | 3 | 1 | 3  | 4.00  |
| 55 | 2 | 1 | 2 | 1 | 1 | 1  | 1 | 1 | 1  | 1.33  |
| 56 | 1 | 4 | 4 | 3 | 1 | 3  | 3 | 1 | 3  | 3.33  |
| 57 | 3 | 2 | 6 | 2 | 3 | 6  | 3 | 1 | 3  | 5.00  |
| 58 | 2 | 3 | 6 | 2 | 2 | 4  | 1 | 4 | 4  | 4.67  |
| 59 | 3 | 2 | 6 | 2 | 3 | 6  | 2 | 3 | 6  | 6.00  |
| 60 | 3 | 2 | 6 | 3 | 3 | 9  | 3 | 3 | 9  | 8.00  |
| 61 | 2 | 1 | 2 | 1 | 2 | 2  | 2 | 1 | 2  | 2.00  |

---

|    |   |   |    |   |   |   |   |   |    |      |
|----|---|---|----|---|---|---|---|---|----|------|
| 62 | 2 | 2 | 4  | 2 | 1 | 2 | 2 | 1 | 2  | 2.67 |
| 63 | 1 | 3 | 3  | 3 | 1 | 3 | 1 | 3 | 3  | 3.00 |
| 64 | 3 | 2 | 6  | 3 | 3 | 9 | 3 | 1 | 3  | 6.00 |
| 65 | 3 | 2 | 6  | 3 | 2 | 6 | 3 | 3 | 9  | 7.00 |
| 66 | 2 | 4 | 8  | 1 | 2 | 2 | 2 | 2 | 4  | 4.67 |
| 67 | 3 | 2 | 6  | 3 | 3 | 9 | 3 | 4 | 12 | 9.00 |
| 68 | 3 | 1 | 3  | 3 | 1 | 3 | 3 | 1 | 3  | 3.00 |
| 69 | 1 | 4 | 4  | 1 | 2 | 2 | 1 | 2 | 2  | 2.67 |
| 70 | 2 | 4 | 8  | 2 | 2 | 4 | 2 | 2 | 4  | 5.33 |
| 71 | 2 | 4 | 8  | 2 | 2 | 4 | 2 | 3 | 6  | 6.00 |
| 72 | 3 | 2 | 6  | 3 | 1 | 3 | 3 | 2 | 6  | 5.00 |
| 73 | 2 | 3 | 6  | 2 | 4 | 8 | 2 | 4 | 8  | 7.33 |
| 74 | 2 | 3 | 6  | 2 | 4 | 8 | 2 | 4 | 8  | 7.33 |
| 75 | 3 | 2 | 6  | 2 | 3 | 6 | 3 | 4 | 12 | 8.00 |
| 76 | 2 | 4 | 8  | 2 | 3 | 6 | 2 | 3 | 6  | 6.67 |
| 77 | 2 | 4 | 8  | 1 | 2 | 2 | 2 | 3 | 6  | 5.33 |
| 78 | 2 | 3 | 6  | 0 | 0 | 0 | 2 | 4 | 8  | 4.67 |
| 79 | 3 | 4 | 12 | 0 | 0 | 0 | 0 | 0 | 0  | 4.00 |
| 80 | 1 | 3 | 3  | 1 | 3 | 3 | 1 | 3 | 3  | 3.00 |
| 81 | 2 | 1 | 2  | 0 | 0 | 0 | 0 | 0 | 0  | 0.67 |
| 82 | 1 | 2 | 2  | 2 | 2 | 4 | 2 | 2 | 4  | 3.33 |
| 83 | 2 | 3 | 6  | 2 | 2 | 4 | 2 | 2 | 4  | 4.67 |
| 84 | 3 | 2 | 6  | 3 | 3 | 9 | 3 | 1 | 3  | 6.00 |
| 85 | 3 | 2 | 6  | 3 | 2 | 6 | 3 | 3 | 9  | 7.00 |
| 86 | 3 | 2 | 6  | 3 | 3 | 9 | 3 | 3 | 9  | 8.00 |
| 87 | 3 | 2 | 6  | 2 | 3 | 6 | 3 | 2 | 6  | 6.00 |
| 88 | 1 | 3 | 3  | 1 | 4 | 4 | 1 | 2 | 2  | 3.00 |
| 89 | 2 | 2 | 4  | 2 | 1 | 2 | 2 | 1 | 2  | 2.67 |
| 90 | 3 | 2 | 6  | 3 | 3 | 9 | 3 | 2 | 6  | 7.00 |

SI: staining intensity.

PP: percentage of positive cells.

IRS: immunoreactive score.
